# Supplementary figures and images for: Functional synergy between the Munc13 C-terminal C1 and C2 domains
Source: eLife journal article supplement (doi:10.7554/elife.13696), 2016-05-23

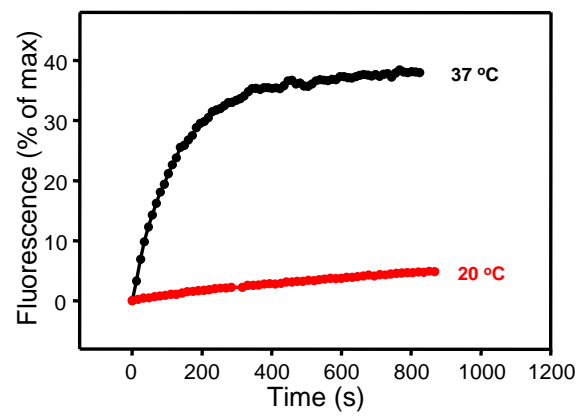

**Figure 6 – figure supplement 4**  
**Liu et al.**

Supplement: supp [file elife-13696-supp-v1.zip]

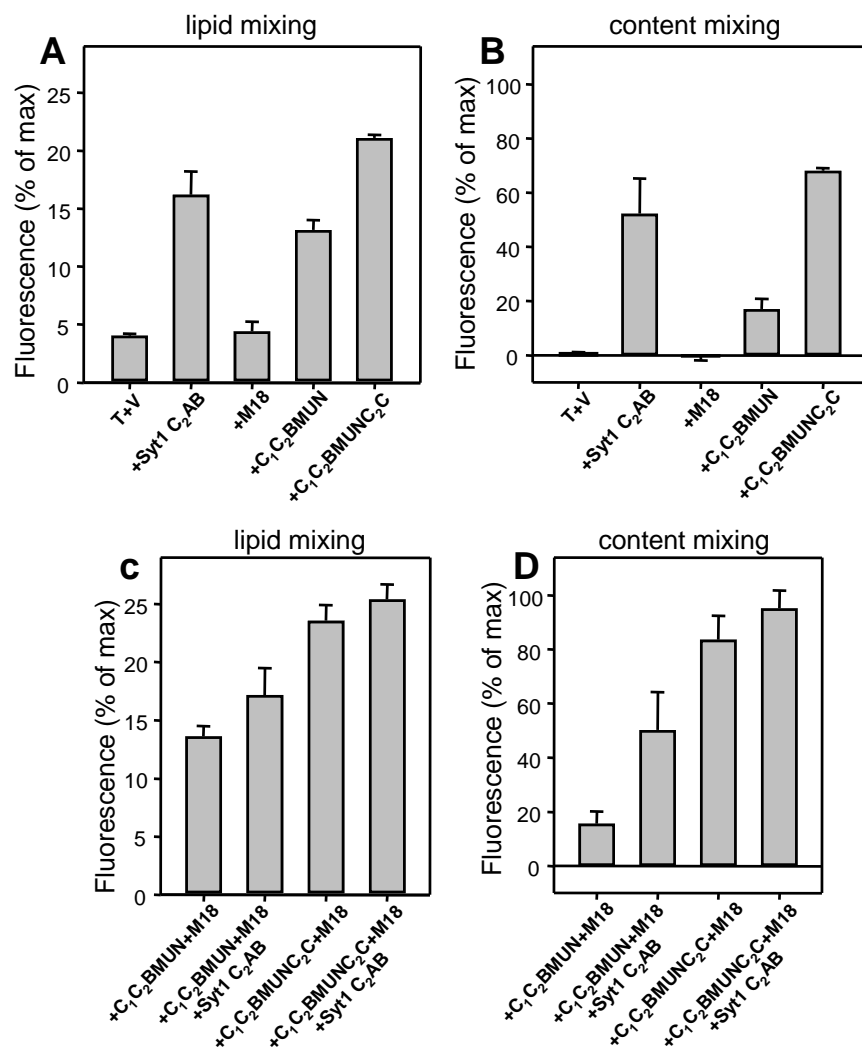

**Figure 5 – figure supplement 1**  
Liu et al.

Supplement: supp [file elife-13696-supp-v1.zip]

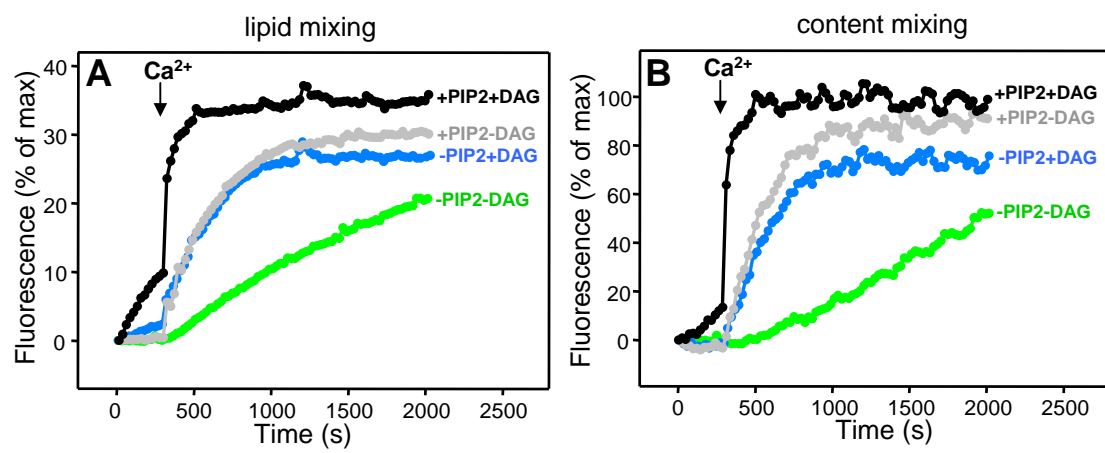

**Figure 4 – figure supplement 2**  
 Liu et al.

Supplement: supp [file elife-13696-supp-v1.zip]

# **A** pLenti/Syn/NLS-GFP/P2A/Munc13-1-Flag

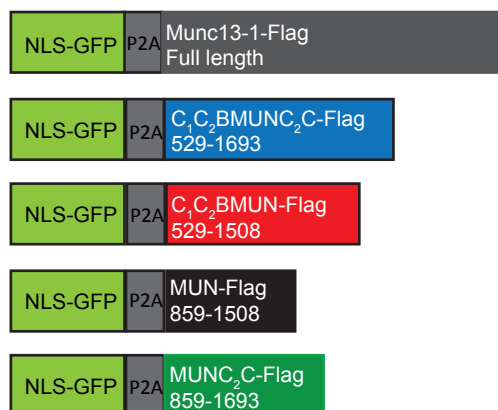

## Munc13-1-Flag protein rescue

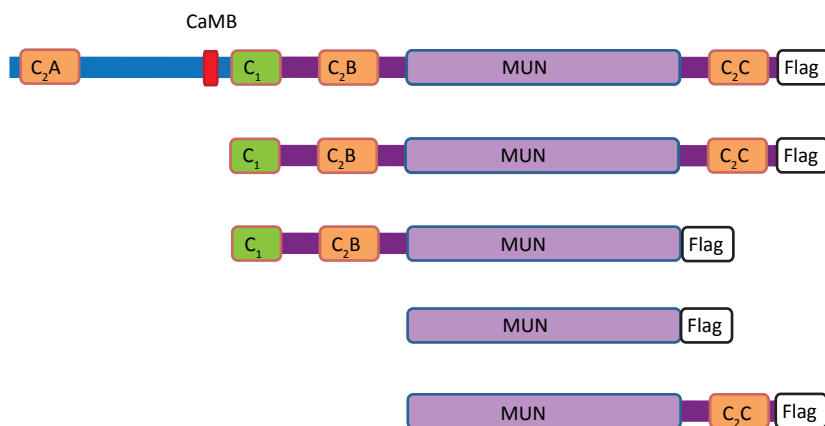

# **B**

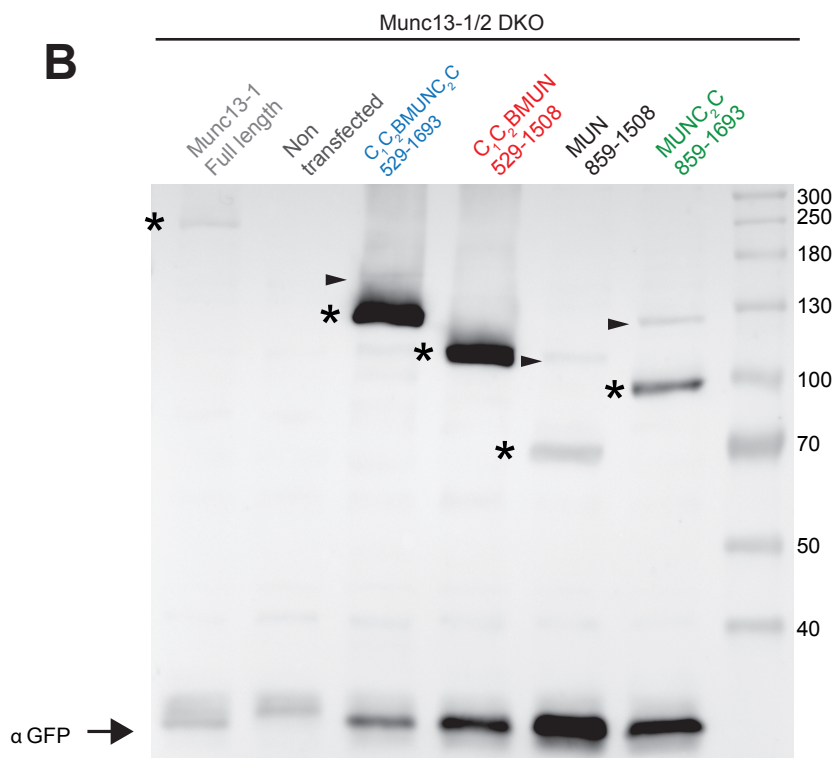

Figure 10 - figure supplement 1  
Liu et al.

Supplement: supp [file elife-13696-supp-v1.zip]

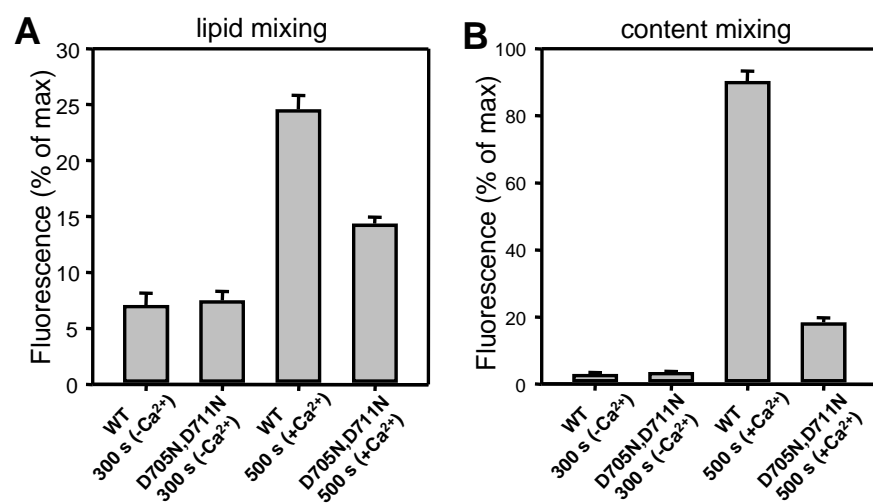

**Figure 9 – figure supplement 2**  
Liu et al.

Supplement: supp [file elife-13696-supp-v1.zip]

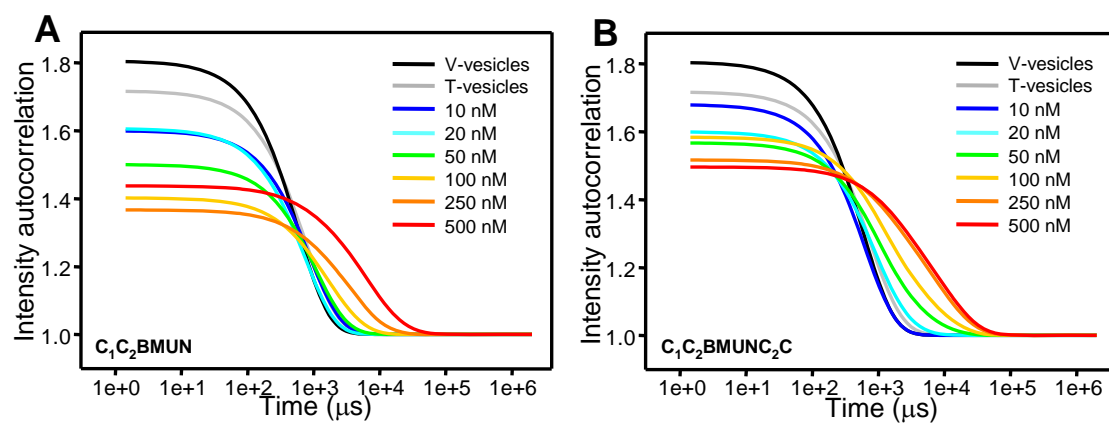

**Figure 6 – figure supplement 1**  
Liu et al.

Supplement: supp [file elife-13696-supp-v1.zip]

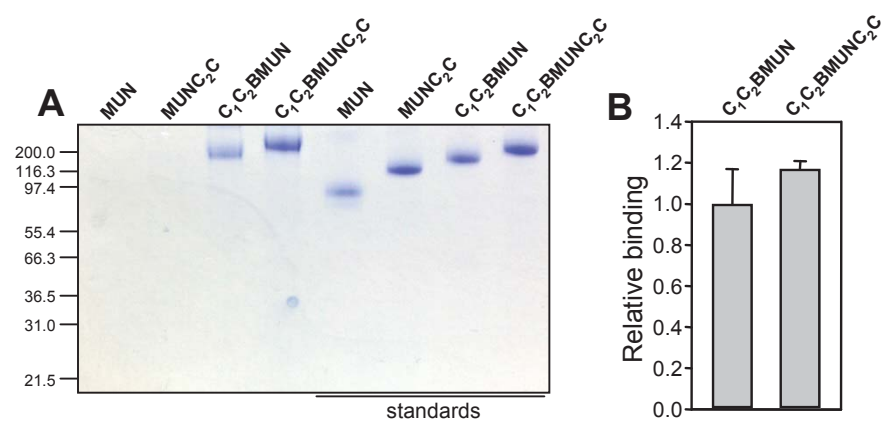

**Figure 6 – figure supplement 2**  
Liu et al.

Supplement: supp [file elife-13696-supp-v1.zip]

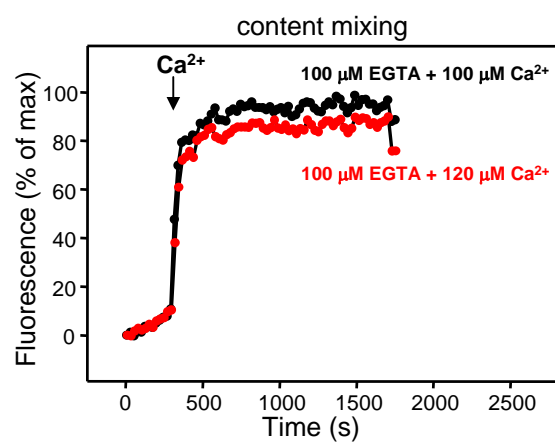

**Figure 4 – figure supplement 3**  
**Liu et al.**

Supplement: supp [file elife-13696-supp-v1.zip]

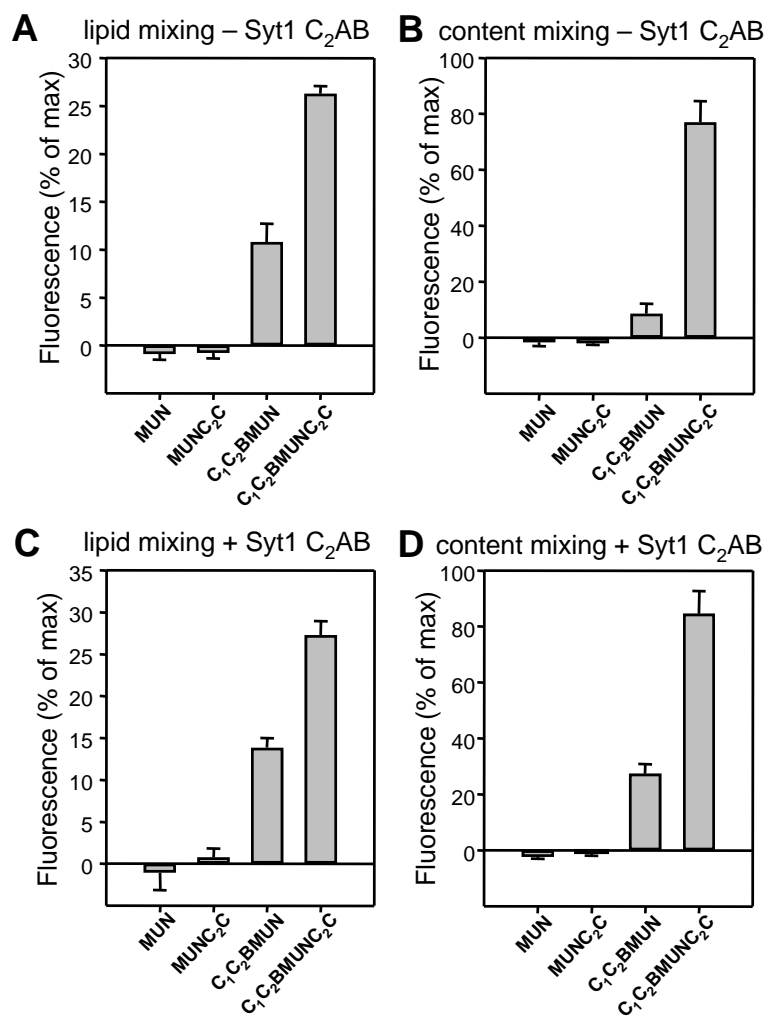

**Figure 4 – figure supplement 1**  
Liu et al.

Supplement: supp [file elife-13696-supp-v1.zip]

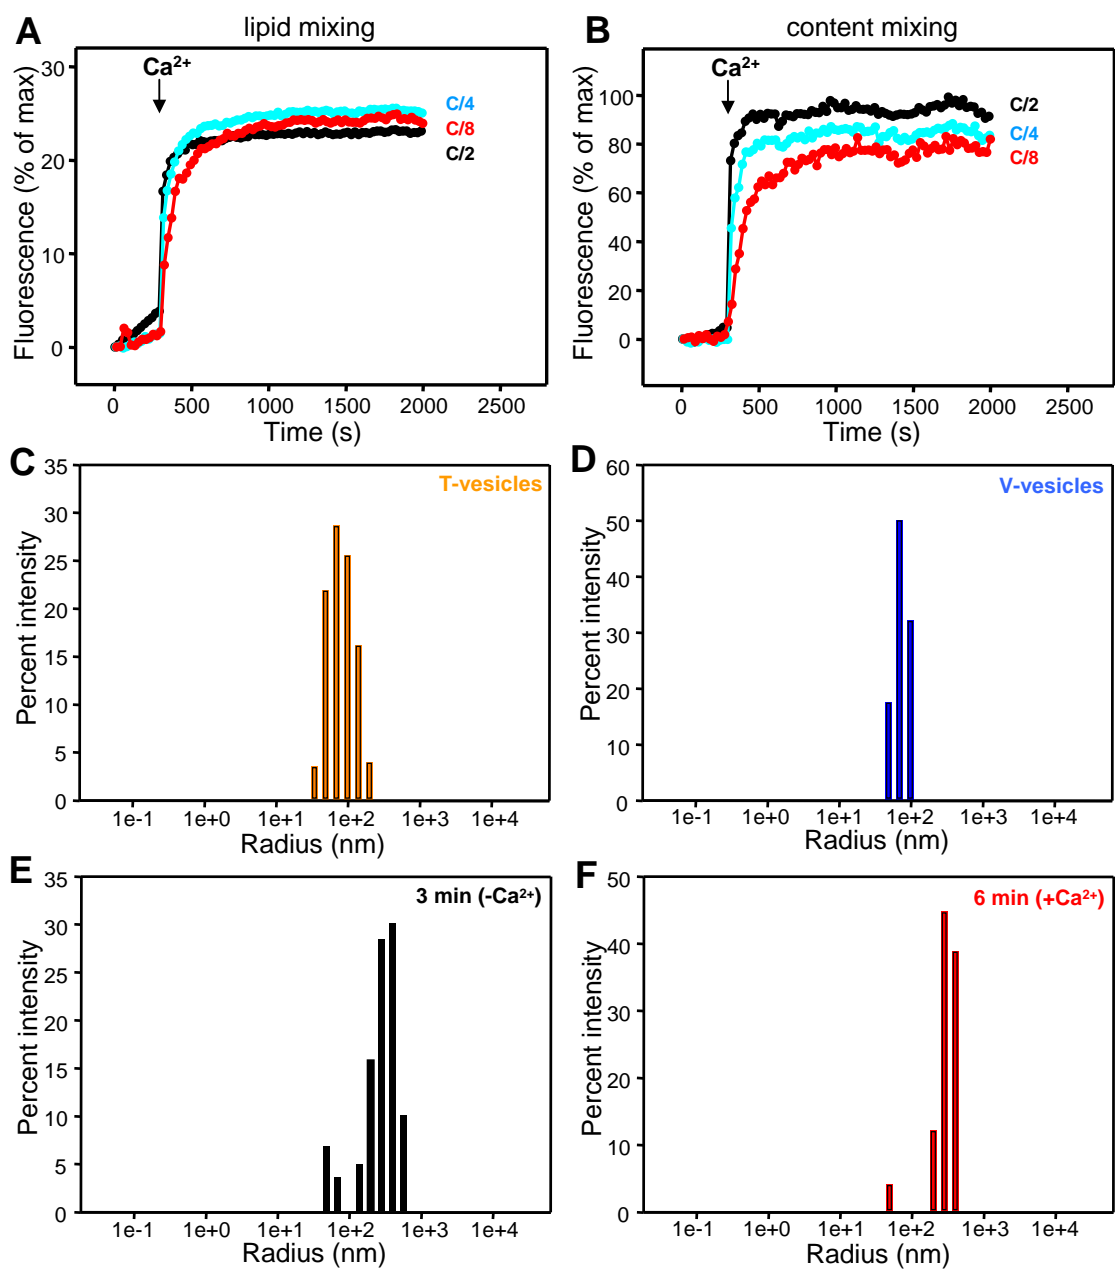

**Figure 4 – figure supplement 4**  
Liu et al.

Supplement: supp [file elife-13696-supp-v1.zip]

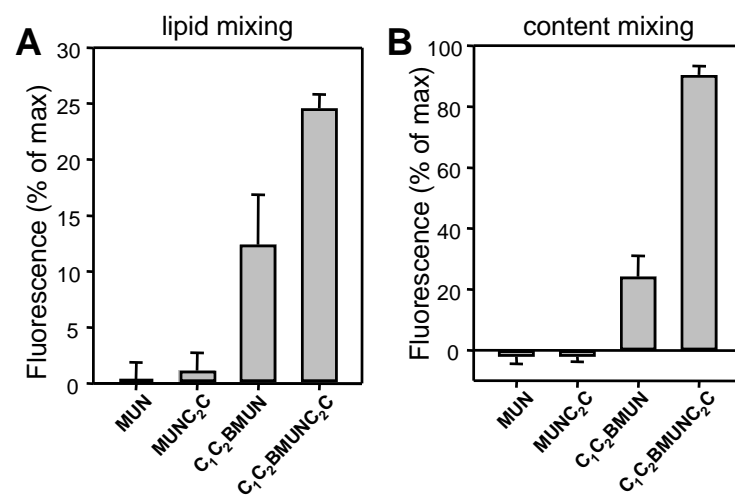

**Figure 9 – figure supplement 1**  
Liu et al.

Supplement: supp [file elife-13696-supp-v1.zip]

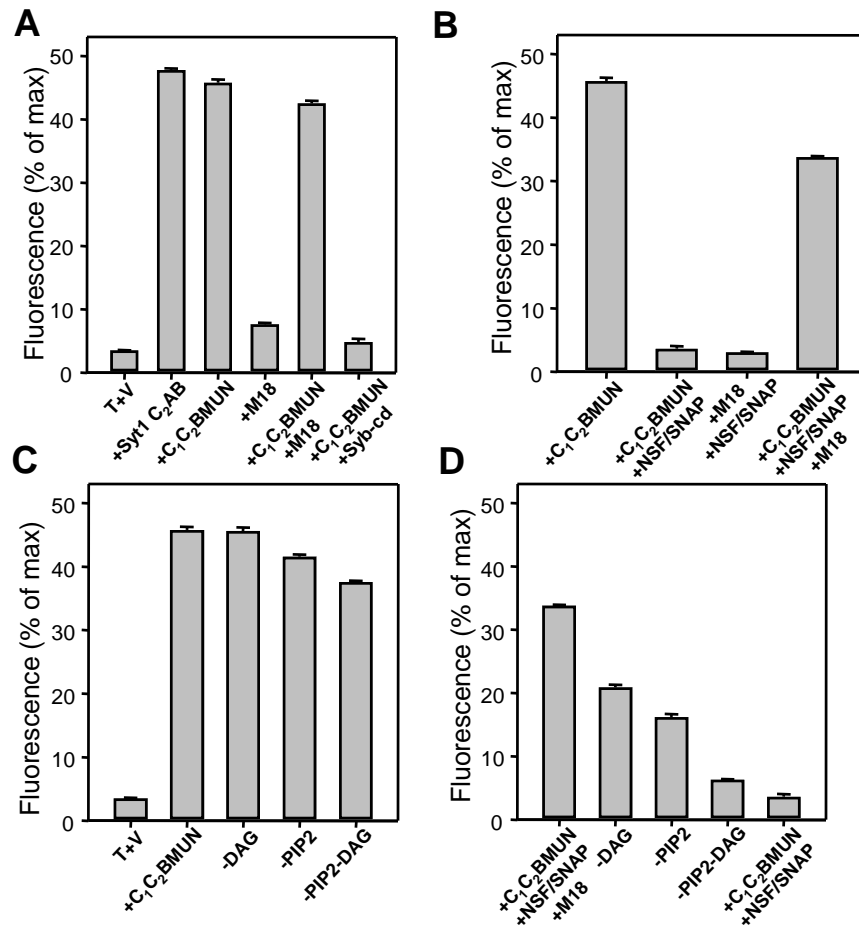

**Figure 1 – figure supplement 1**  
Liu et al.

Supplement: supp [file elife-13696-supp-v1.zip]

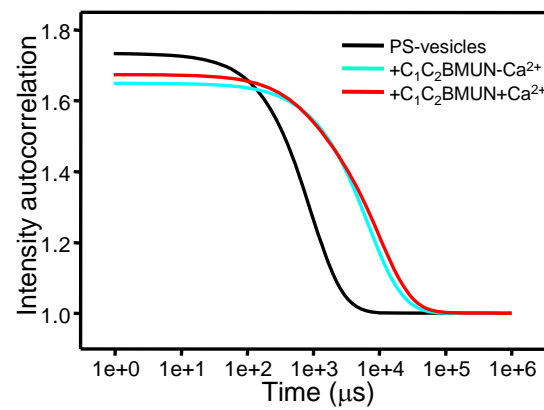

**Figure 2 – figure supplement 1**  
**Liu et al.**

Supplement: supp [file elife-13696-supp-v1.zip]

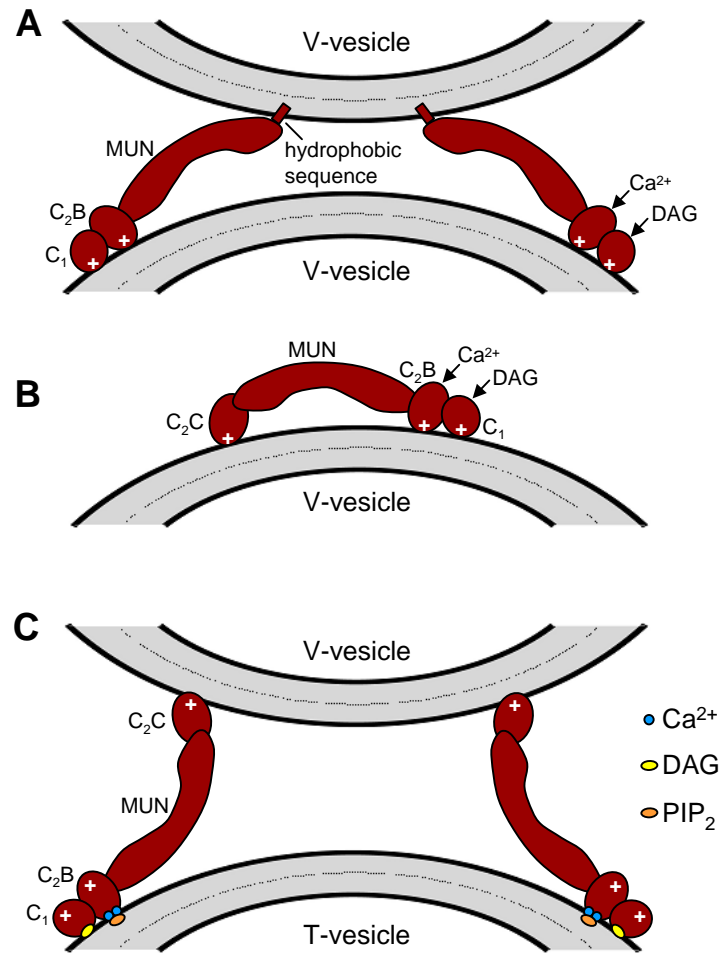

**Figure 7 – figure supplement 1**  
**Liu et al.**

Supplement: supp [file elife-13696-supp-v1.zip]

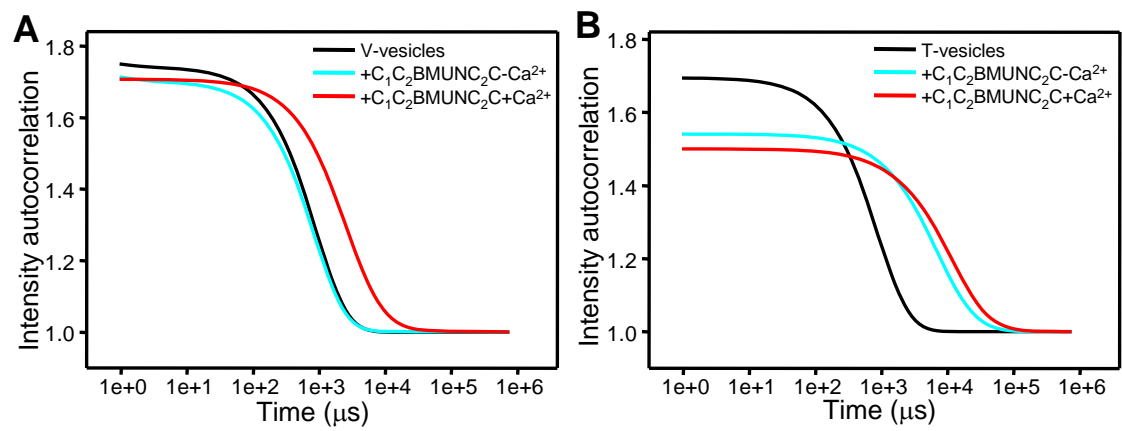

**Figure 6 – figure supplement 3**  
Liu et al.

Supplement: supp [file elife-13696-supp-v1.zip]

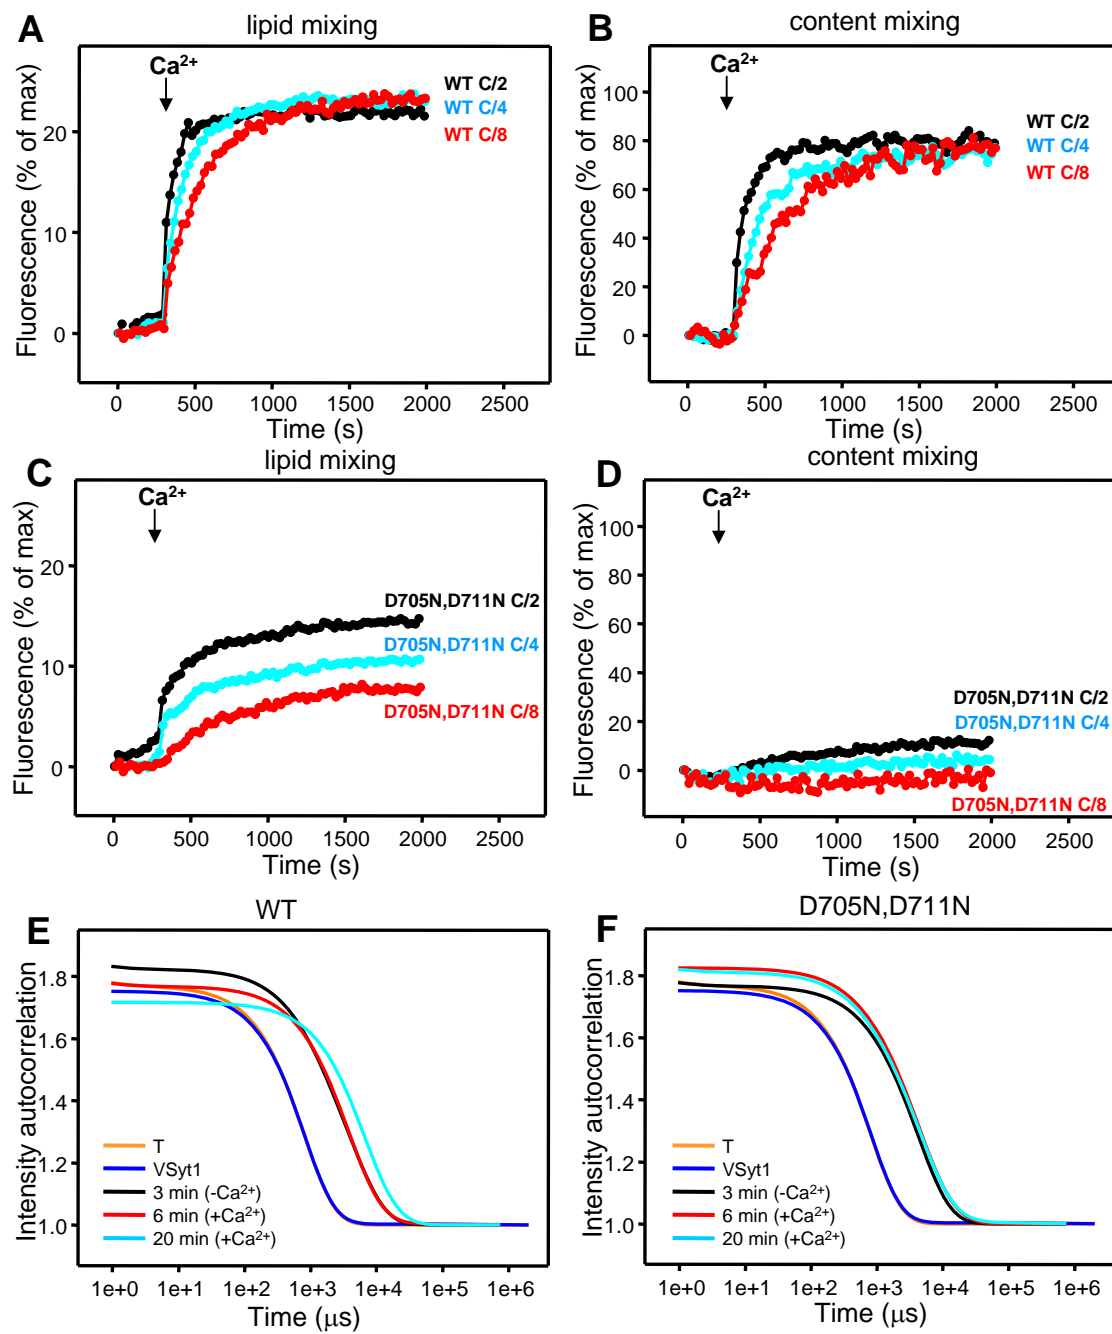

**Figure 9 – figure supplement 3**  
 Liu et al.

Supplement: supp [file elife-13696-supp-v1.zip]

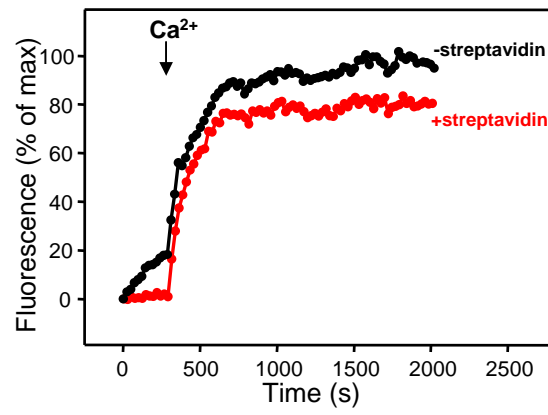

**Figure 3 – figure supplement 1**  
**Liu et al.**

Supplement: supp [file elife-13696-supp-v1.zip]
